# Supplementary material
Source: PubMed Central journal article supplement (PMC2717784)

# **Evidence for STIM1- and Orai1 (CRACM1)-dependent Store-Operated Calcium Influx through $I_{CRAC}$ in Vascular Smooth Muscle cells: Role in Proliferation and Migration**

Marie Potier, José C. Gonzalez, Rajender K. Motiani, Iskandar F. Abdullaev, Jonathan M. Bisailon, Harold A. Singer, and Mohamed Trebak

## **Online Data Supplement**

### **LEGENDS TO SUPPLEMENTARY FIGURES**

**Figure S1.** RT-PCR from synthetic cultured VSMC showing mRNA expression of STIM and Orai isoforms.

**Figure S2.** Western Blots analysis showing protein levels of STIM1 (**A**), Orai1 (**B**), Orai3 (**C**), TRPC1 (**D**), TRPC4 (**E**) and TRPC6 (**F**) with or without gene specific siRNA transfection. A scrambled siRNA and anti-Actin Western Blots are used as controls. Arrows point to specific protein bands. The same blots have been stripped and reprobed several times and asterisks point to bands presumably representing actin.

**Figure S3.** Vectors carrying shRNA hairpins against STIM1 (**A**; control n=36; shSTIM1 n=20) or Orai1 (**B**; control n=20; shOrai1 n=14) were transfected into synthetic cultured VSMC (the empty vector was used as a control) and SOCE was evoked by 2 $\mu$ M thapsigargin and measured using Fura2 imaging. Data are representative of 3 independent experiments.

**Figure S4.** Western Blots analysis of STIM1 (A) and Orai1 (B) protein levels in cultured synthetic rat aortic VSMC (Synth. VSMC) and their quiescent freshly isolated counterparts (Quiesc. VSMC).

**Figure S5. A;** photographs of scratch wound migration assay in primary cultured VSMC in the presence of 10% serum at 24 hours post-wound in control siRNA-, Orai2 siRNA-, Orai3 siRNA- and STIM2 siRNA-transfected cells. Data (represented as % of control) are representative of 2 different siRNA sequences with 3 independent experiments per siRNA (4 wells per transfection) and statistical analysis is shown in B. C; Proliferation in VSMC transfected with scrambled control siRNA, Orai2 siRNA, Orai3 siRNA and STIM2 siRNA was assayed at different times post-transfection. Data are represented as % of control and are representative of 4 independent experiments (12 wells per condition).

#### PCR Primers

|        | Forward (5'-3')          | Reverse (3'-5')         | Size Amplified (bp) |
|--------|--------------------------|-------------------------|---------------------|
| rSTIM1 | GGCCAGAGTCTCAGCCATAG     | CATAGGTCCTCCACGCTGAT    | 305                 |
| rSTIM2 | TAAGCTGTCTCGCTGCTTCA     | CAGTAGCGCTCTCGGGTTAC    | 241                 |
| rOrai1 | ACGTCCACAACCTCAACTCC     | ACTGTCCGGTCCGTCTTATGG   | 362                 |
| rOrai2 | CACCTATTTGCCCTGCTCAT     | AGCTTGTGCAGTTCCTCGAT    | 386                 |
| rOrai3 | CTGTCCACCAGTCACCACAC     | CCACCAAGGATCGGTAGAAA    | 422                 |
| rTRPC1 | TATGGGGAAGAAGTGCAGTCC    | CAGATCTTGGCGCAGTTCATT   | 467                 |
| rTRPC4 | GCCTACACCTTTCAATGTCATCCC | CTTAGGTTATGTCTCTCGGAGGC | 492                 |
| rTRPC6 | GTGCCAAGTCCAAAGTCCCTGC   | CTGGGCCTGCAGTACGTATC    | 315                 |

**siRNA Sequences**

|                   |                      |
|-------------------|----------------------|
| Scrambled control | UGGUUUACAUGUCGACUAA  |
| TRPC1-1           | CTGCTCATCGTAACAACATA |
| TRPC1-2           | GAGAAATGCTGTTACCATA  |
| TRPC4-1           | GGCTCAGTTCTATTACAAA  |
| TRPC4-2           | CCACGAGGTCCGCTGTAAC  |
| TRPC6-1           | GGACCAGCATAACATGTTTA |
| TRPC6-2           | GTGTGGATTACATGGGCCA  |
| STIM1-1           | UAAGGGAAGACCUCAAUUA  |
| STIM1-2           | CAUCAGAAGUGUAUAAACUG |
| STIM2-1           | GGACUUACAAGCUUUA AUG |
| STIM2-2           | GGGACUGUUUUCACUUUUA  |
| Orai1-1           | CAACAGCAAYCCGGAGCUU  |
| Orai1-2           | GCCAUAAAGACGGACCGACA |
| Orai2-1           | GCCACAACCGUGAGAUCGA  |
| Orai2-2           | GCAUGCACCCGUACAUCGA  |
| Orai3-1           | GGGUCAAGUUUGUGCCCAU  |
| Orai3-2           | CCACGUACCGGGAGUUCGU  |

**shRNA Sequences**

|         |                               |
|---------|-------------------------------|
| Orai1-1 | TGGATCGGCCAGAGTTACTCCGAGGTGAT |
| Orai1-2 | GACCGACAGTTCAGGAGCTCAACGAGCT  |
| STIM1-1 | GATGATGCCAATGGTGATGTGGATGTGGA |
| STIM1-2 | CTGCTGGTTTGCCTATATCCAGAACCGTT |

**Supplementary Table:** Sequences of primers used in PCR and qPCR. STIM1, STIM2, Orai1, Orai2, Orai3 primers were designed using Primer3 Program from MIT. The TRPC1 primers were from Ohba et al(1), while all other TRPC primers were from Bergdahl et al(2). SiRNA and shRNA sequences are also listed; siRNA sequences were designed using the siDESIGN CENTER on Dharmacon website. All siRNA were purchased from Dharmacon while shRNA were purchased from Origene.

1. Ohba, T., Watanabe, H., Murakami, M., Takahashi, Y., Iino, K., Kuromitsu, S., Mori, Y., Ono, K., Iijima, T., and Ito, H. (2007) Upregulation of TRPC1 in the development of cardiac hypertrophy. *Journal of molecular and cellular cardiology* **42**, 498-507
2. Bergdahl, A., Gomez, M. F., Wihlborg, A. K., Erlinge, D., Eyjolfson, A., Xu, S. Z., Beech, D. J., Dreja, K., and Hellstrand, P. (2005) Plasticity of TRPC expression in arterial smooth muscle: correlation with store-operated Ca<sup>2+</sup> entry. *American journal of physiology* **288**, C872-880

# Supplementary Figure 1

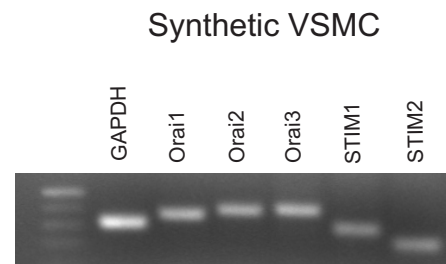

# Supplementary Figure 2

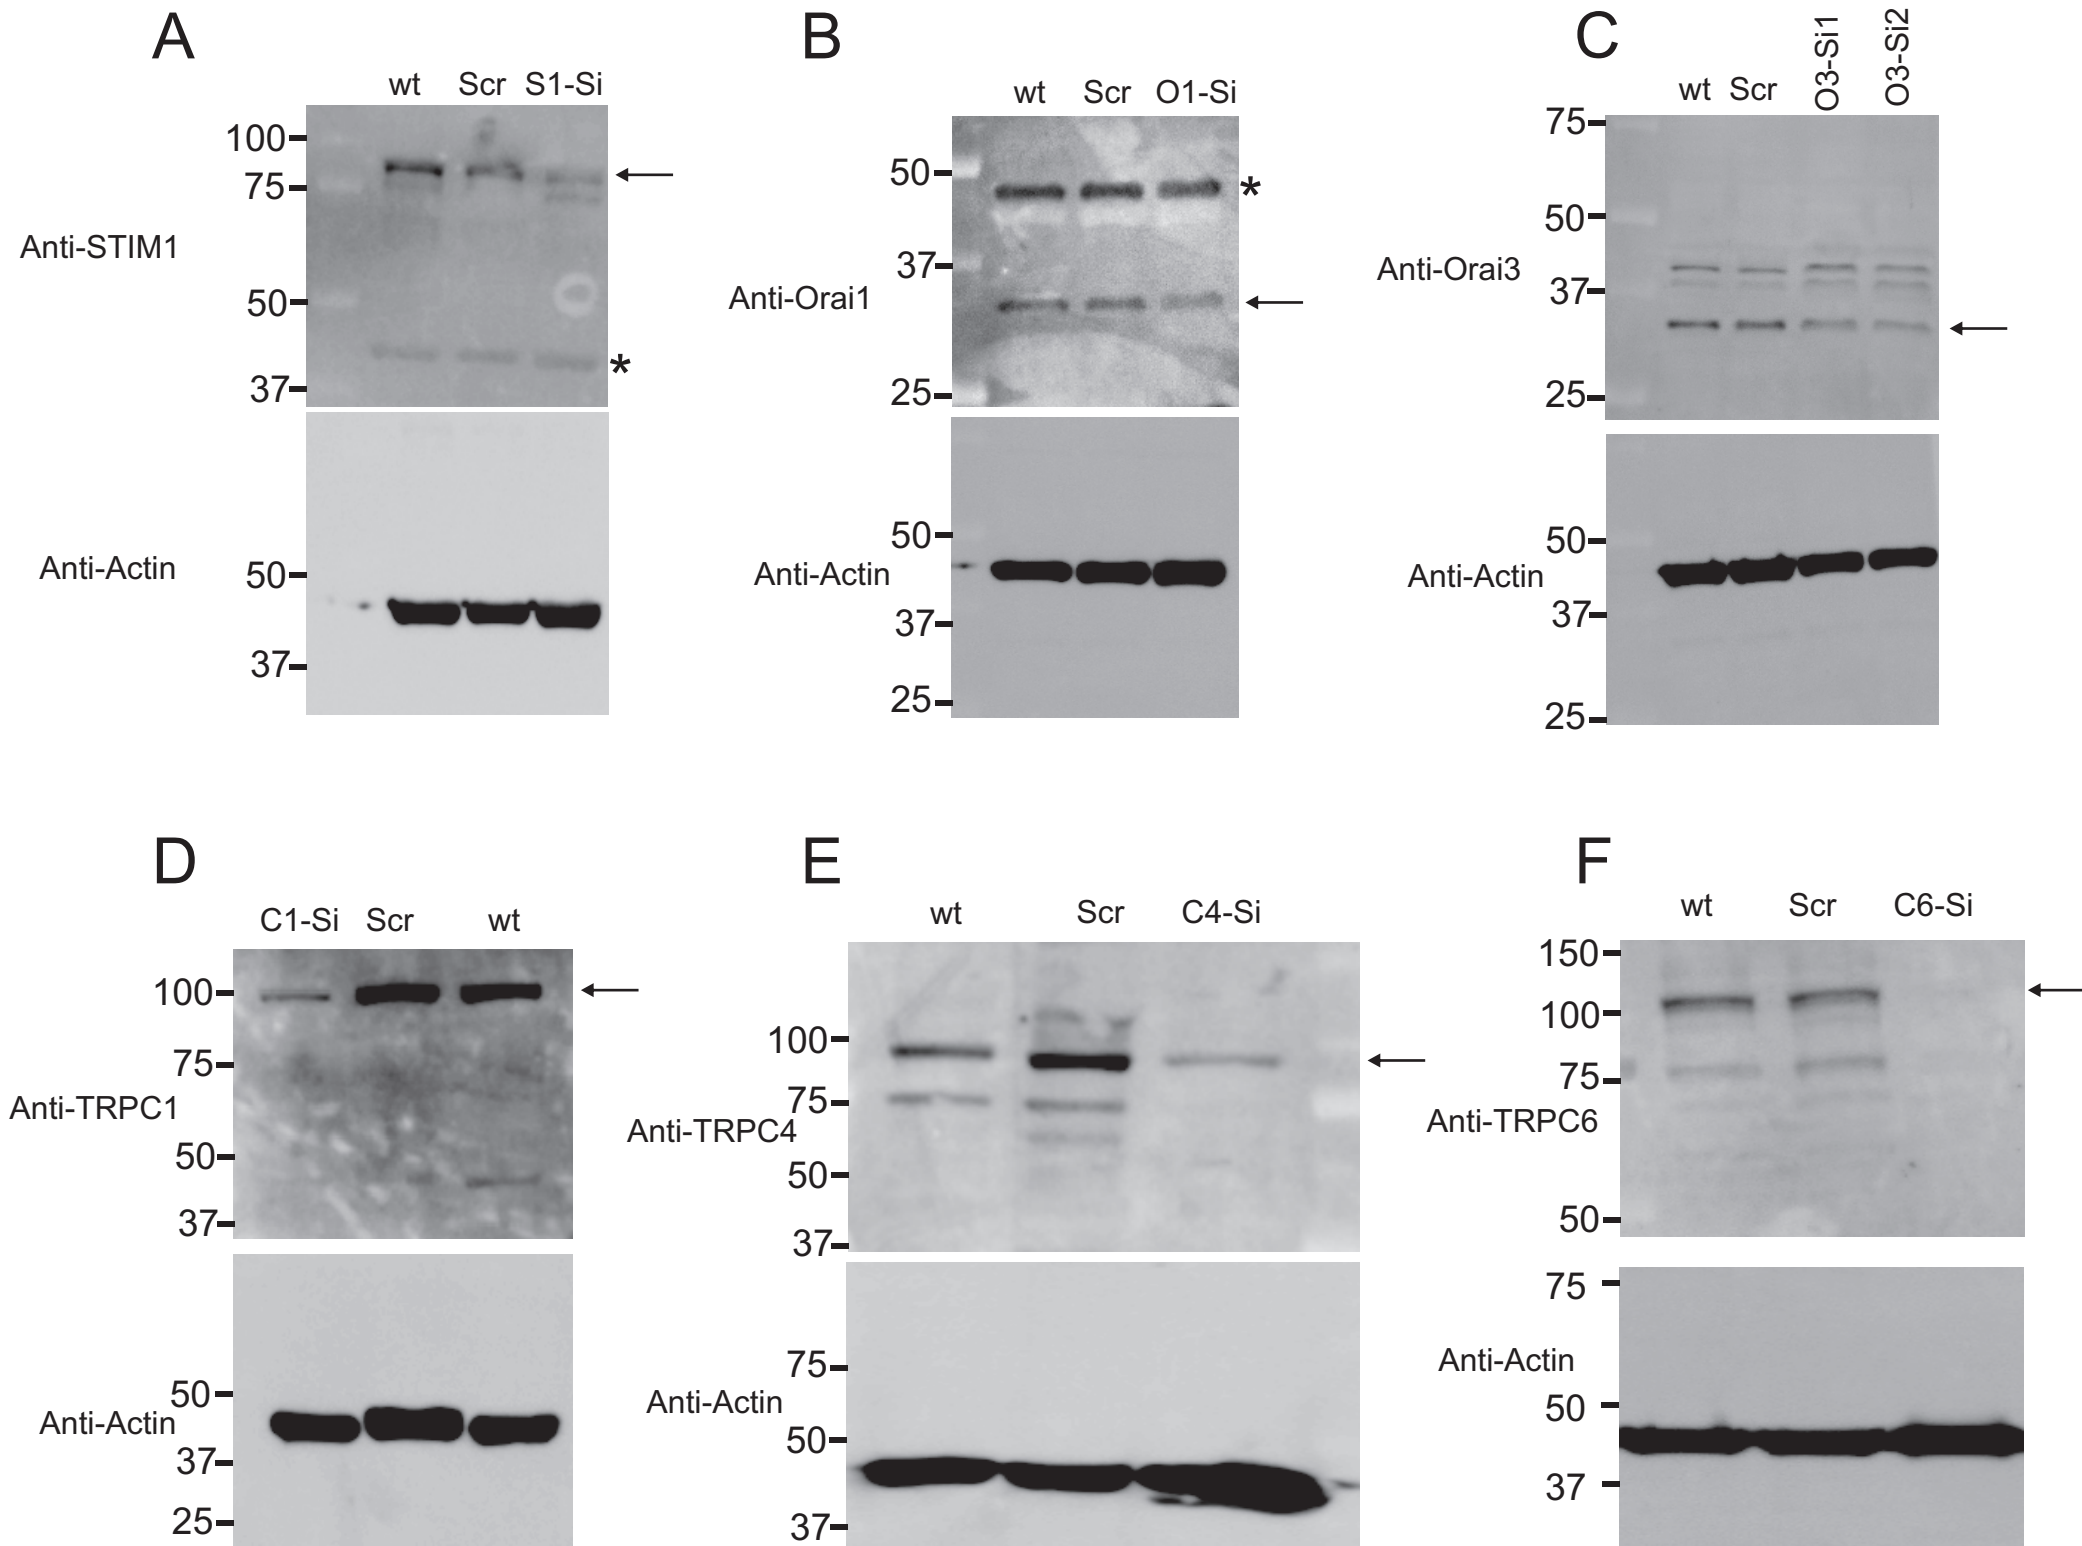

# Supplementary Figure 3

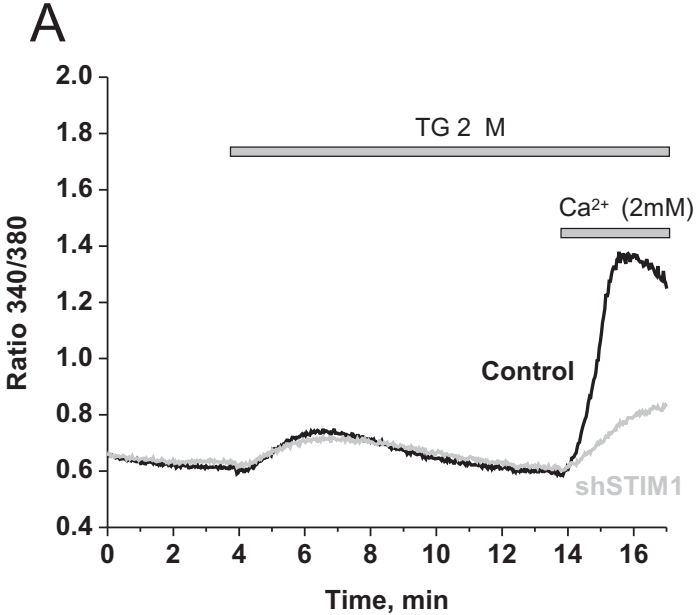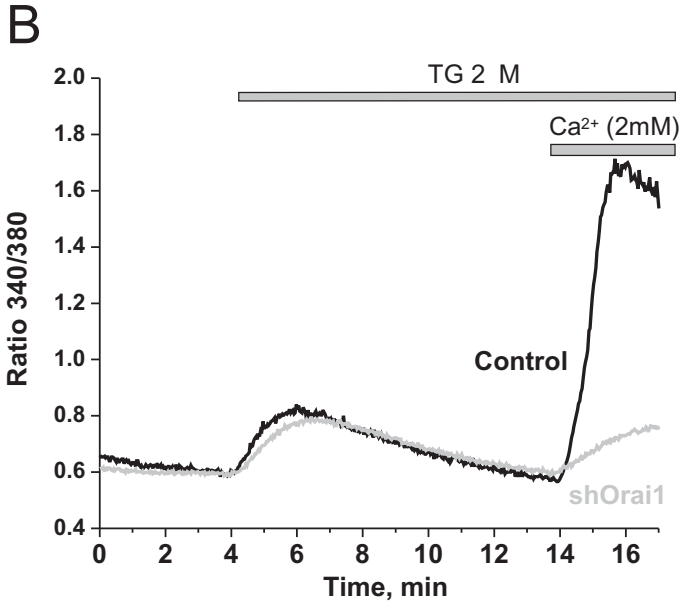

# Supplementary Figure 4

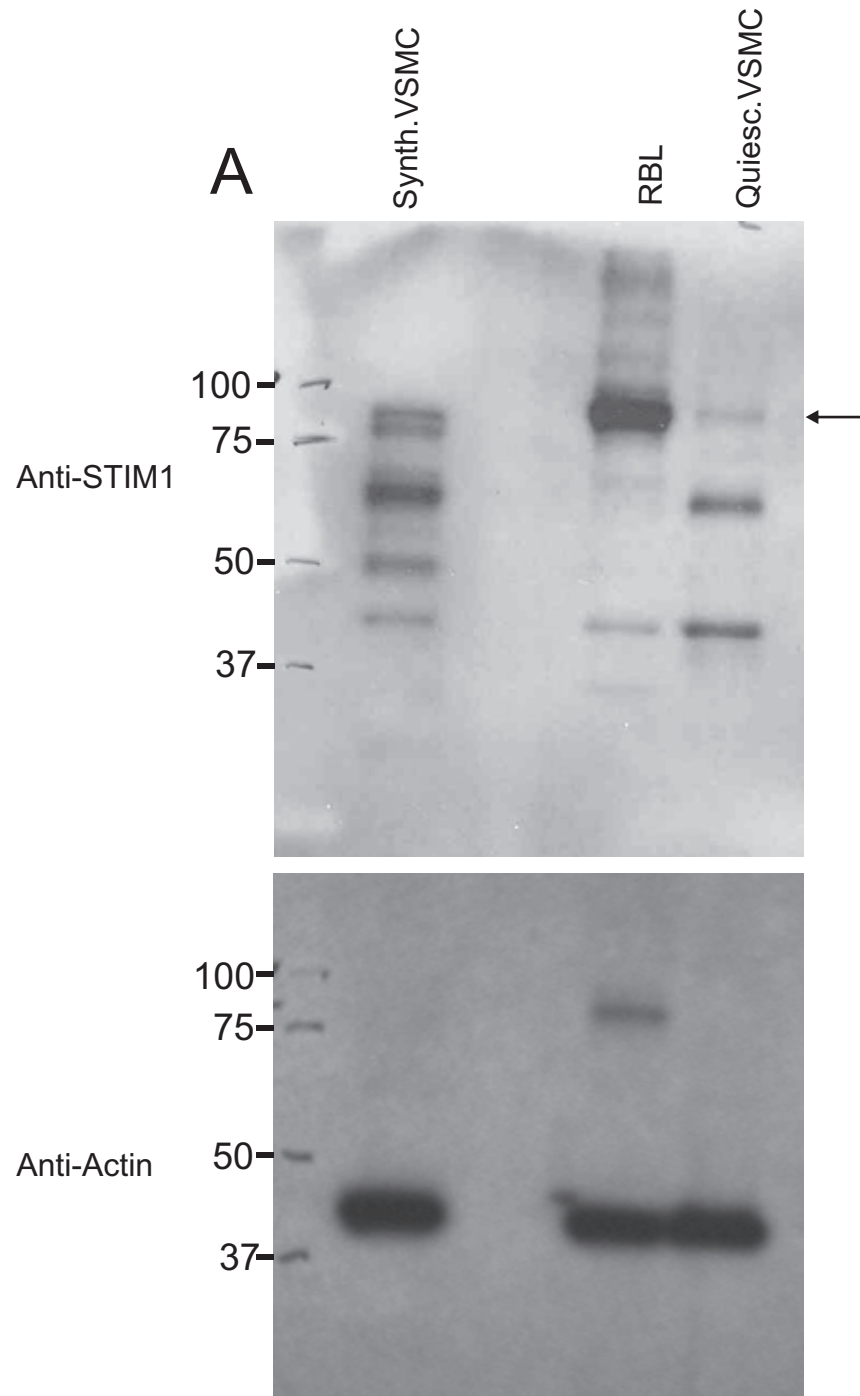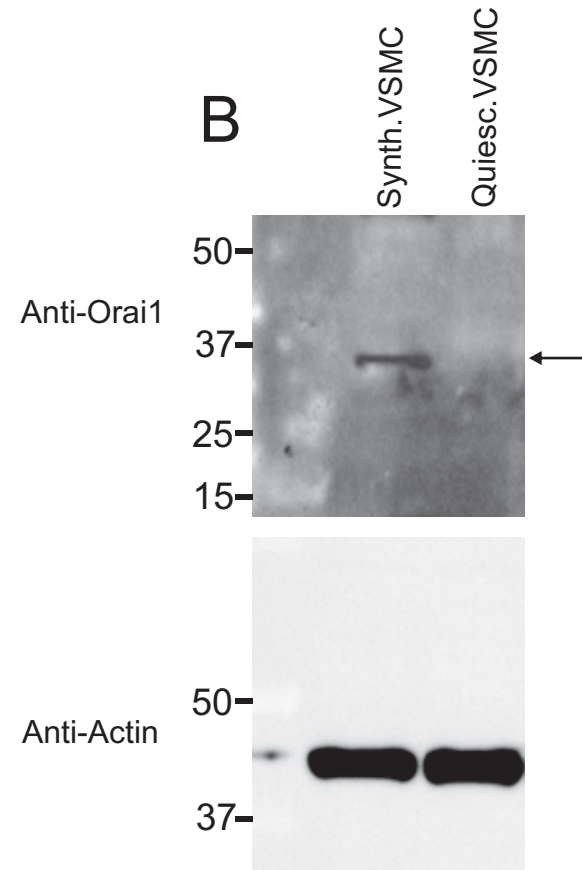



# Supplementary Figure 5

A

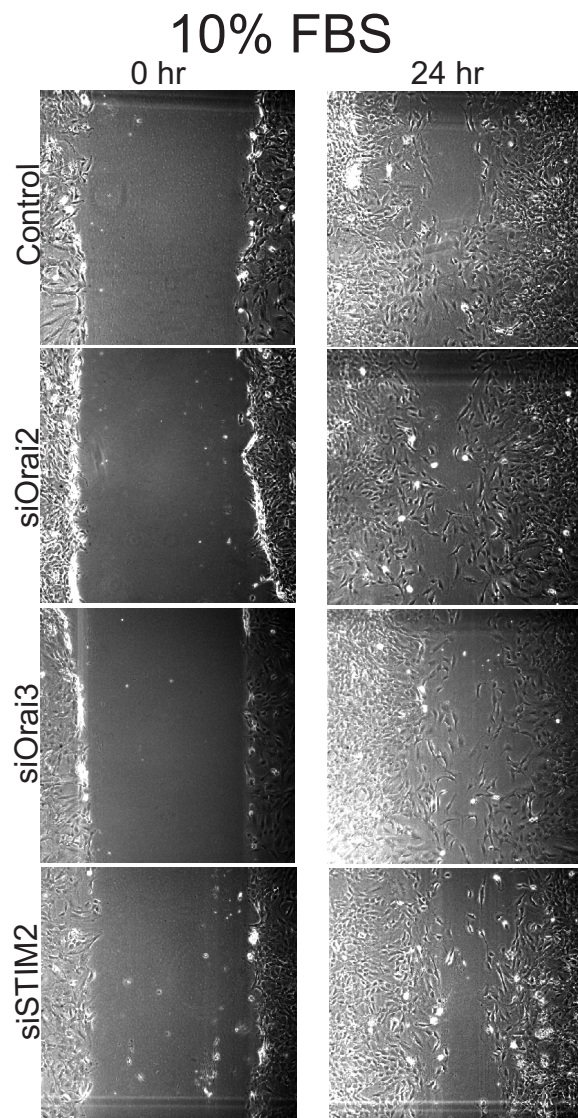

B

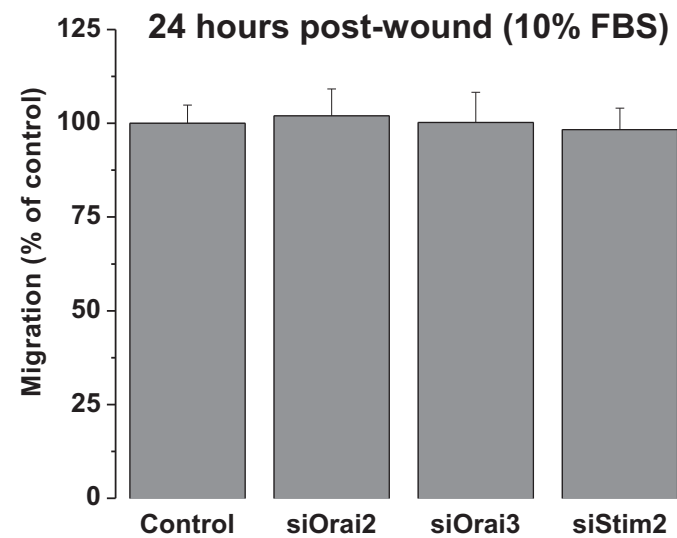

C

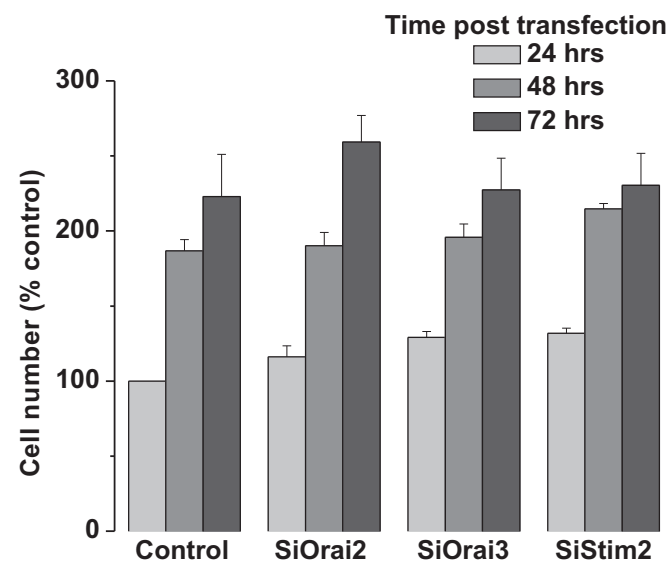

Supplement: fj.09-131128_1.pdf [file fj.09-131128_1.pdf]
